# Supplementary material for: Use of simple analytical solutions in the calibration of shallow water equation debris flow models
Source: Copernicus journal article supplement (doi:10.5194/esurf-13-665-2025), 2025-08-05
Supplement: Supplementary file 1 [file esurf-13-665-2025-supplement.pdf]

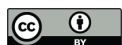

## *Supplement of*

# **Use of simple analytical solutions in the calibration of shallow water equation debris flow models**

**Riccardo Bonomelli et al.**

*Correspondence to:* Riccardo Bonomelli ([riccardo.bonomelli@unibs.it](mailto:riccardo.bonomelli@unibs.it))

The copyright of individual parts of the supplement might differ from the article licence.

## 1 Photo survey of the debris flow occurred in the Blè basin

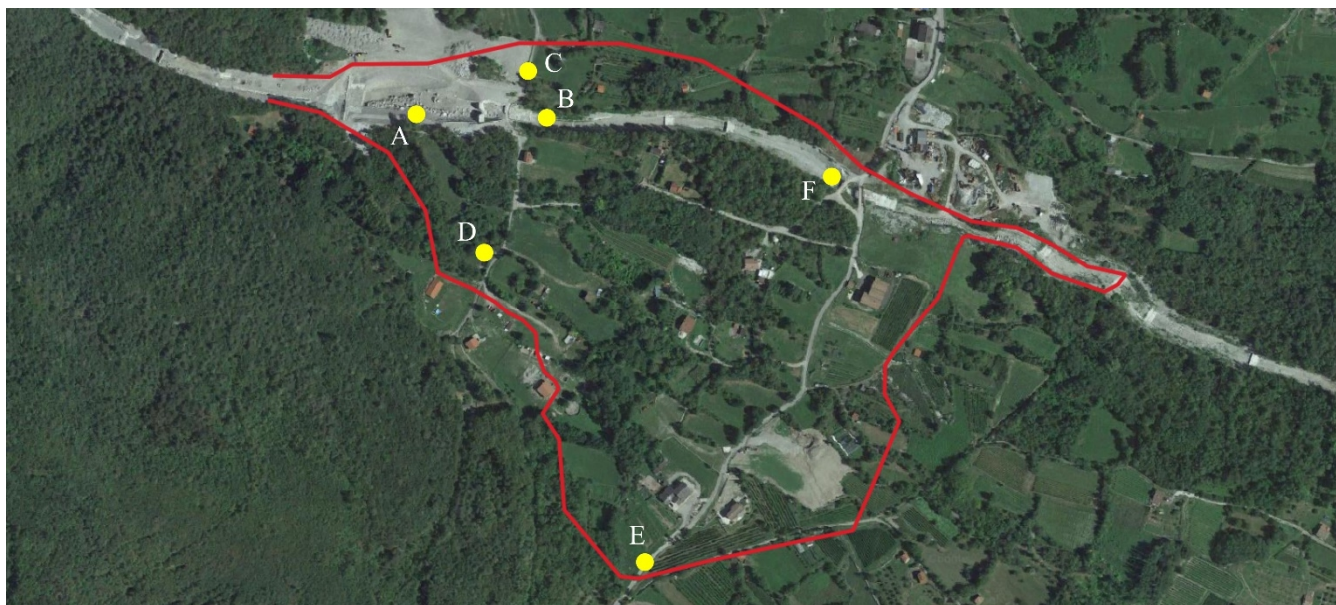

Figure S1. Map showing some photos taken after the debris flow event, (© Google Earth 2019).



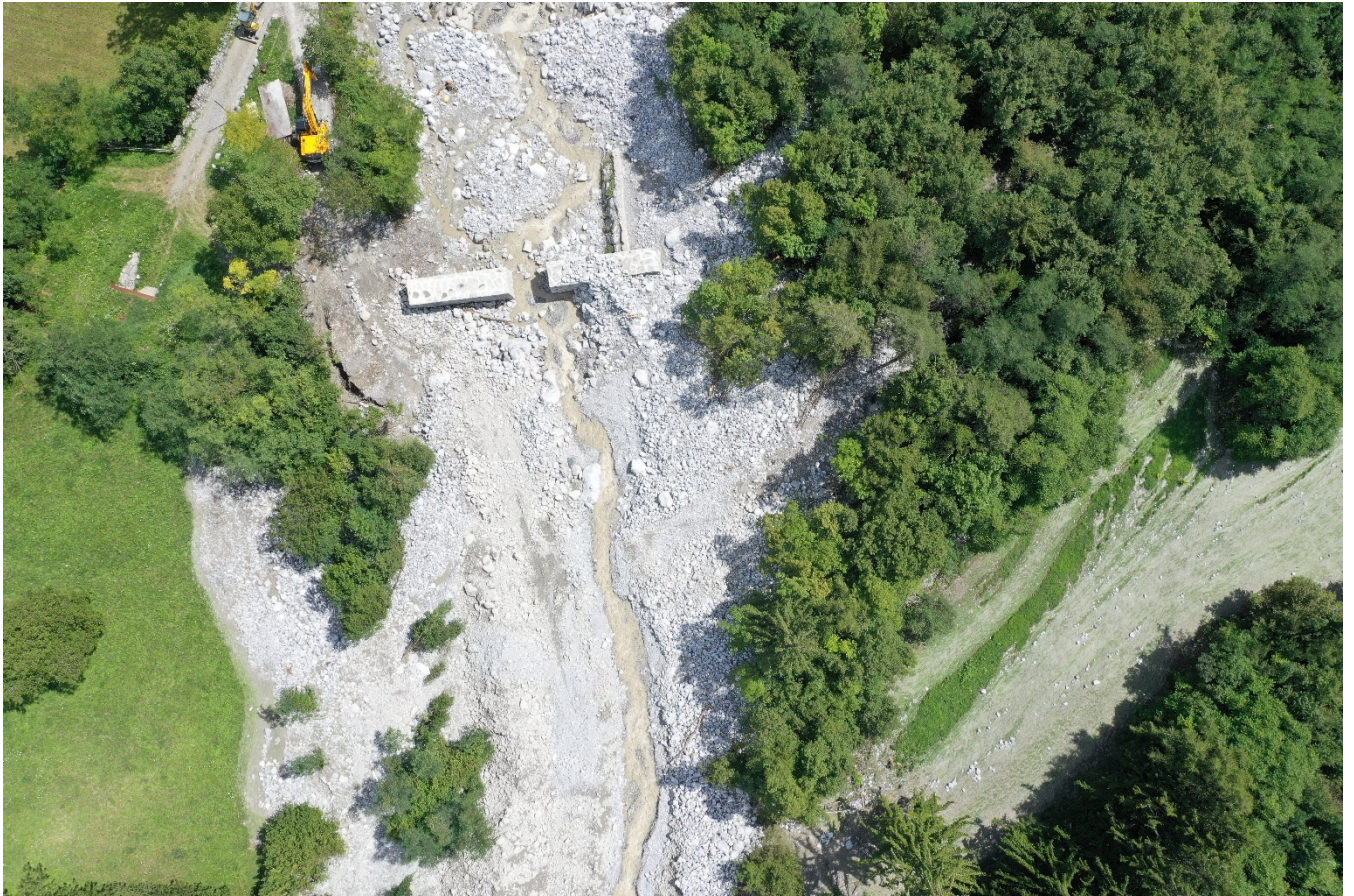

5 **Figure S2. Photo A (© Regione Lombardia 2021).**



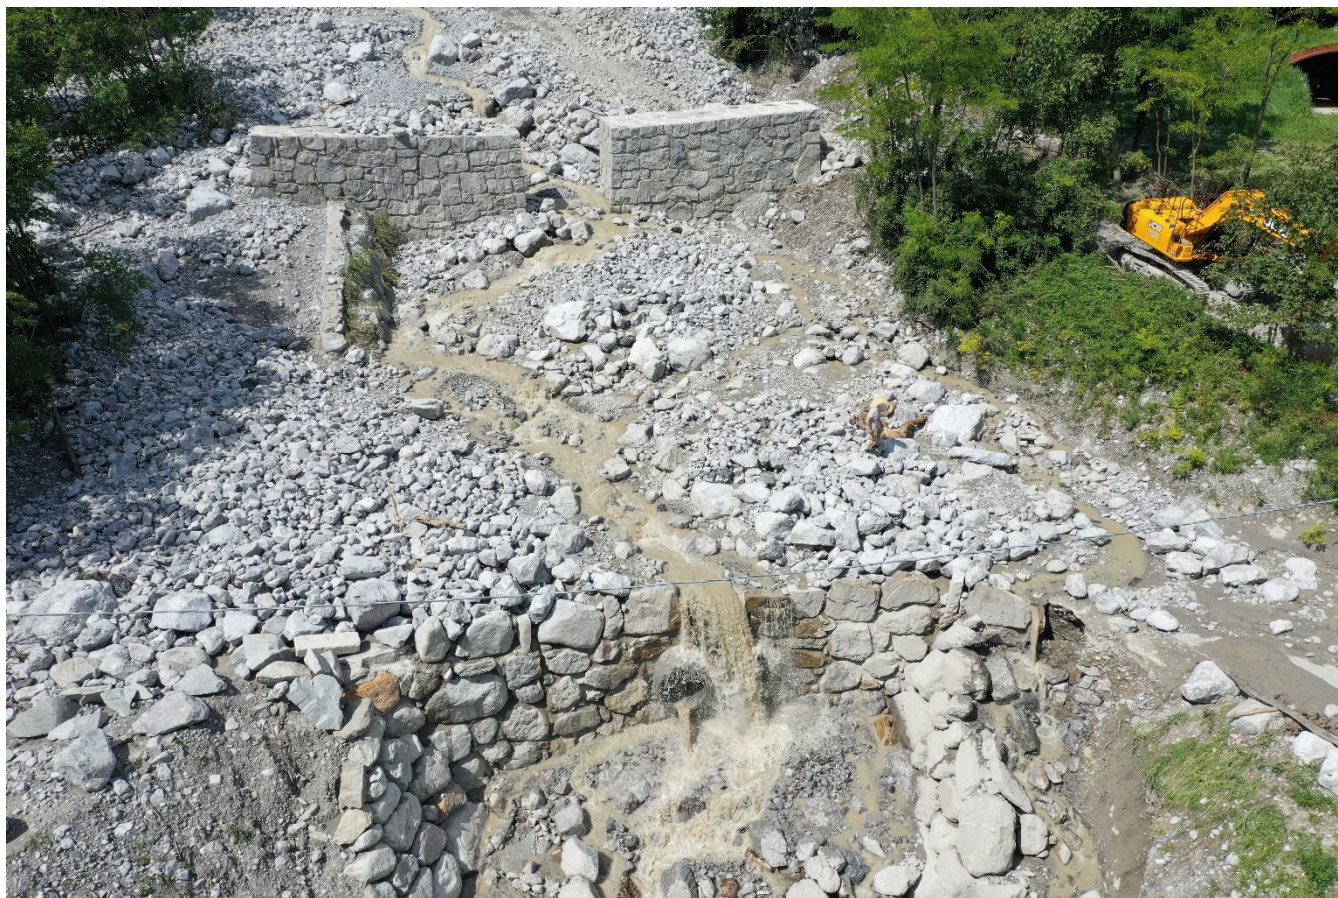

**Figure S3. Photo B (© Regione Lombardia 2021).**



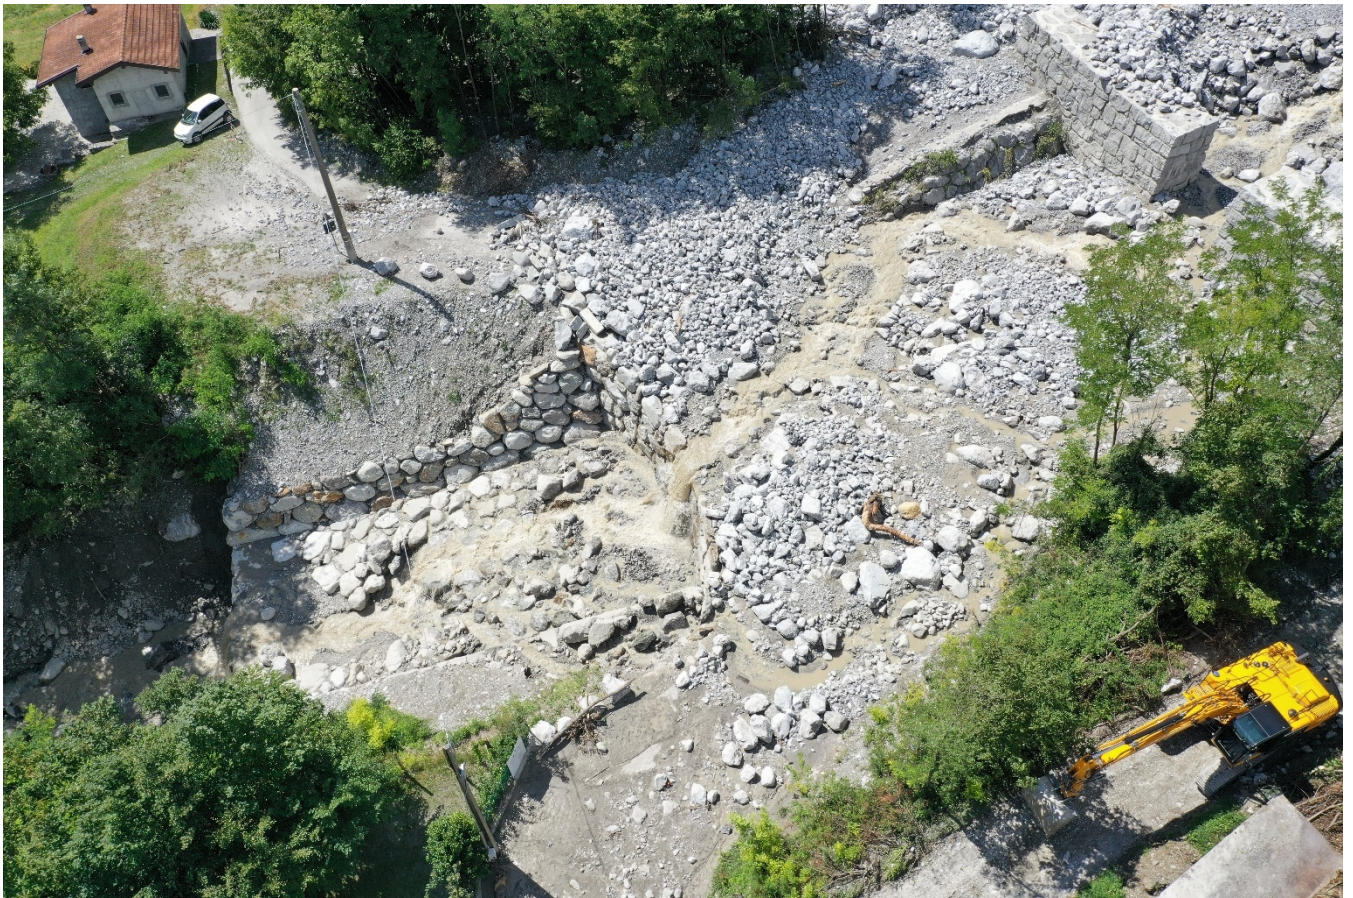

**Figure S4. Photo C (© Regione Lombardia 2021).**



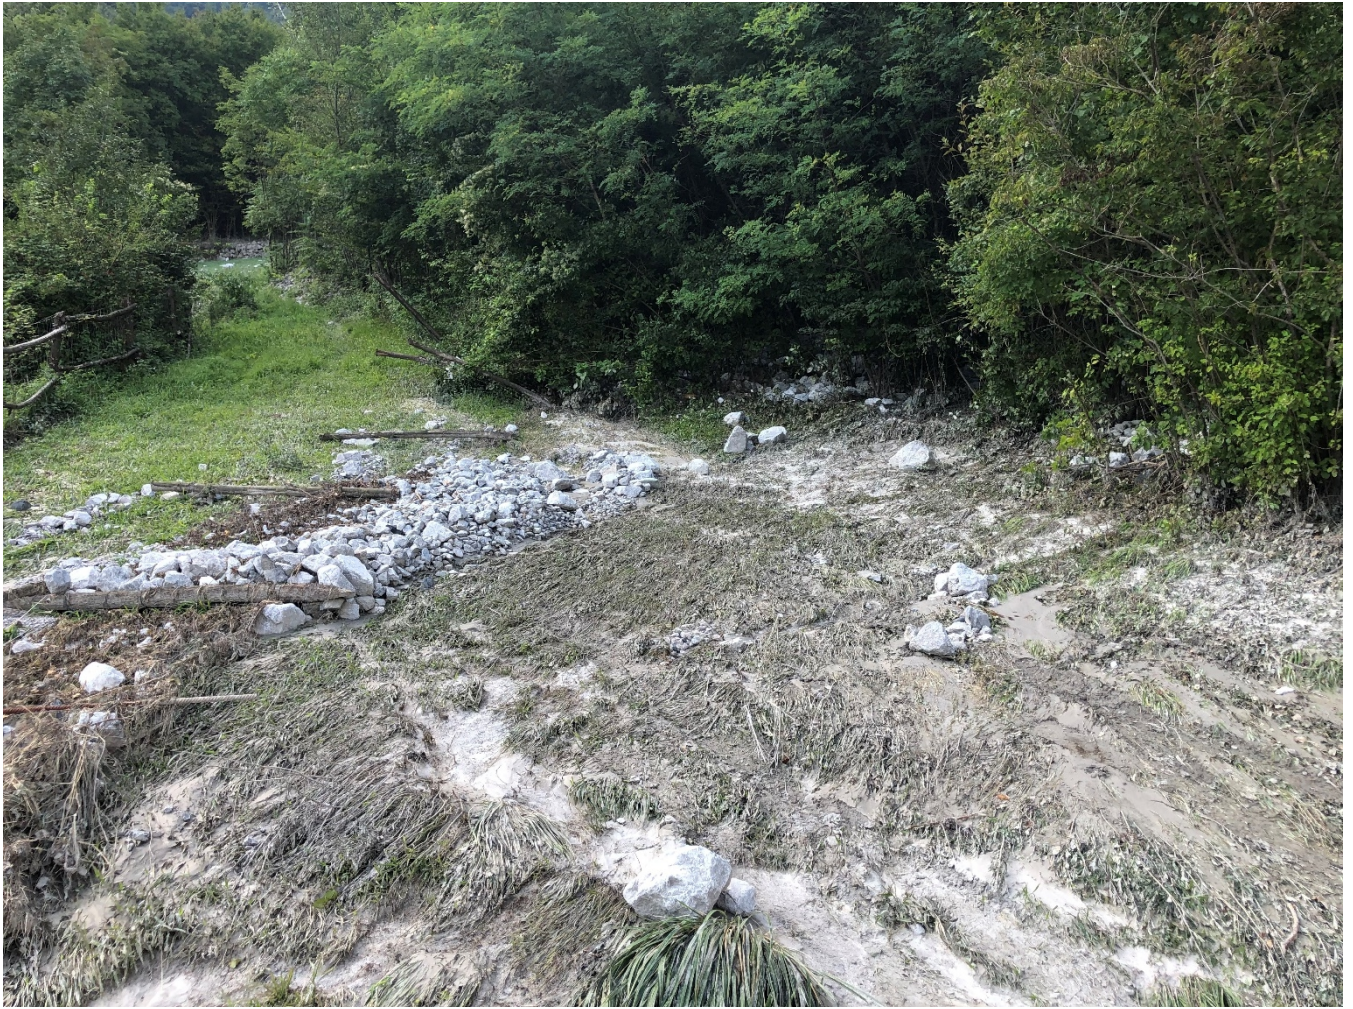

10

**Figure S5. Photo D. (© Pilotti 2021).**



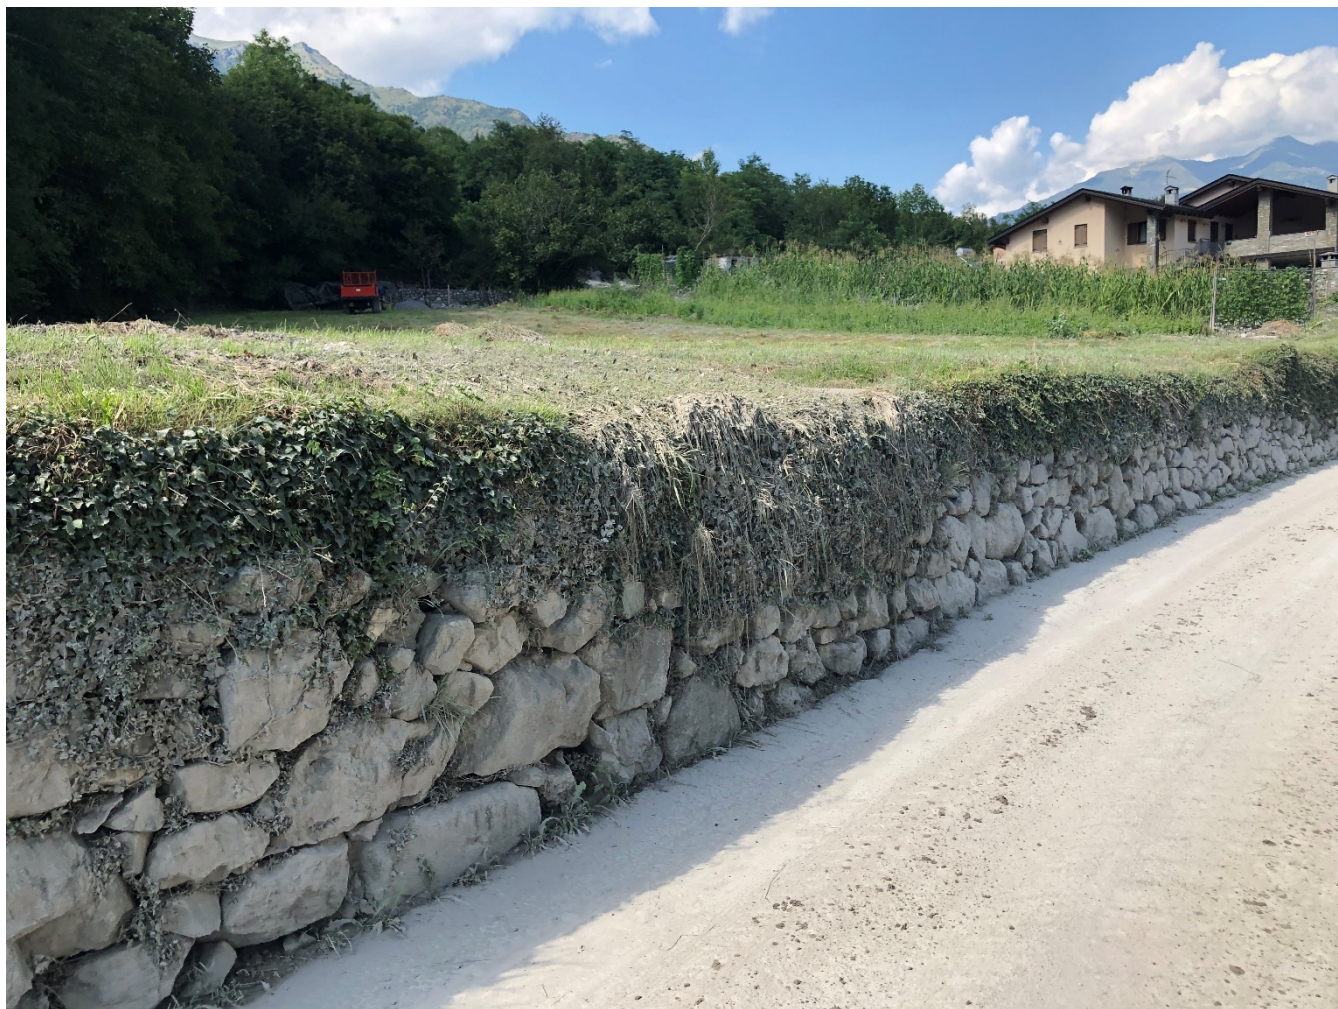

**Figure S6. Photo E (© Pilotti 2021).**



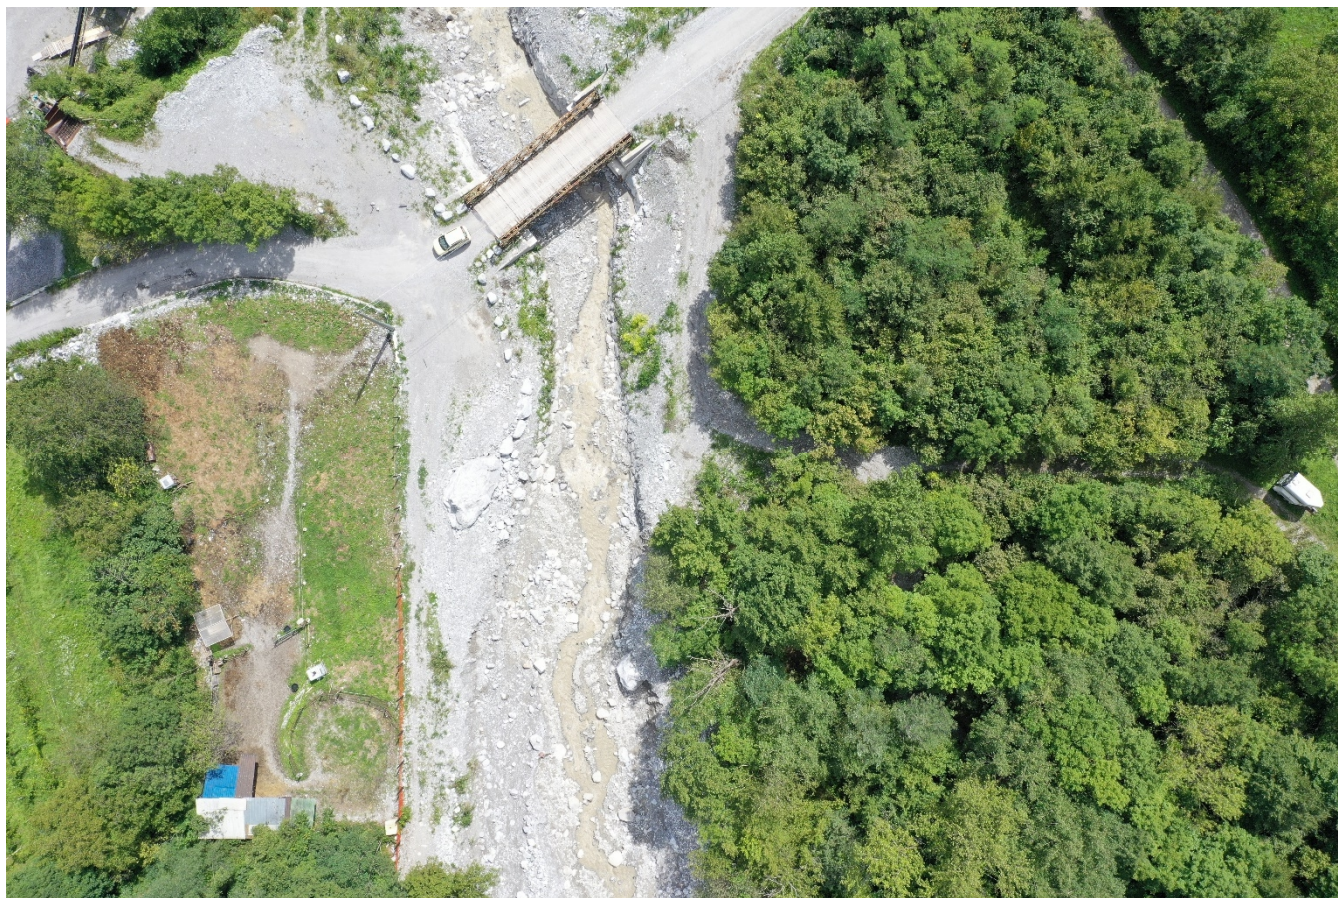

15 **Figure S7. Photo F (© Regione Lombardia 2021).**
